# Supplementary material for: Fly ash electrodes fabricated by an acid-assisted subcritical water extraction method for supercapacitor applications
Source: Royal Society of Chemistry journal article supplement (doi:10.1039/d2nj05087k), 2023-01-01
Supplement: d2nj05087k1.pdf [file d2nj05087k1.pdf]

## Supplementary Data

### Fly Ash Electrodes Fabricated by Acid-Assisted Subcritical Water

#### Extraction Method for Supercapacitor Application

Jenni Lie<sup>a,b,c,§</sup>, Hardy Shuwanto<sup>d,§</sup>, Hairus Abdullah<sup>d</sup>, Suryadi Ismadji<sup>a,b</sup>,

IDAAWarmadewanthi<sup>e</sup>, Felycia Edi Soetaredjo<sup>a,b,c\*</sup>

<sup>a</sup>Department of Chemical Engineering, Widya Mandala Surabaya Catholic University, Kalijudan 37, Surabaya 60114, Indonesia

<sup>b</sup>Collaborative Research Center for Zero Waste and Sustainability, National Research and Innovation Agency, Indonesia.

<sup>c</sup>Science and Technology Innovation Center for Circular Economy and Green Innovative Resources, Taiwan-Indonesia.

<sup>d</sup>Department of Industrial Engineering, Universitas Prima Indonesia, Medan, Indonesia

<sup>e</sup>Department of Environmental Engineering, Faculty of Civil, Planning, and Geo Engineering, Institut Teknologi Sepuluh Nopember. Kampus ITS Sukolilo, Surabaya 60111, Indonesia

§Jenni Lie and Hardy Shuwanto have equal contribution on this work

\*Corresponding author: [felyciae@ukwms.ac.id](mailto:felyciae@ukwms.ac.id)

**Table S1.** GCD curves of SWE treated-FA electrodes in 3 M KOH solution.

| Samples             | Current density (A.g <sup>-1</sup> ) | $\Delta V$ (V) | $\Delta t$ (s) | Specific Capacitance (F.g <sup>-1</sup> ) | Energy density (W.h.kg <sup>-1</sup> ) | Power density (W.kg <sup>-1</sup> ) |
|---------------------|--------------------------------------|----------------|----------------|-------------------------------------------|----------------------------------------|-------------------------------------|
| FA-H <sub>2</sub> O | 2                                    | 0.5            | 52             | 208                                       | 7                                      | 500                                 |
| FA-0.1 M            | 2                                    | 0.5            | 60             | 240                                       | 8                                      | 500                                 |
| FA-0.5 M            | 2                                    | 0.5            | 155            | 620                                       | 22                                     | 500                                 |

|               |   |     |     |     |    |     |
|---------------|---|-----|-----|-----|----|-----|
| <b>FA-1 M</b> | 2 | 0.5 | 108 | 432 | 15 | 500 |
|---------------|---|-----|-----|-----|----|-----|

**Table S2.** GCD curves of FA-0.5 M sample under different current densities in 3 M KOH solution.

| <b>Current density (A.g<sup>-1</sup>)</b> | <b><math>\Delta V</math> (V)</b> | <b><math>\Delta t</math> (s)</b> | <b>Specific Capacitance (F.g<sup>-1</sup>)</b> | <b>Energy density (W.h.kg<sup>-1</sup>)</b> | <b>Power density (W.kg<sup>-1</sup>)</b> |
|-------------------------------------------|----------------------------------|----------------------------------|------------------------------------------------|---------------------------------------------|------------------------------------------|
| 2                                         | 0.5                              | 155                              | 620                                            | 22                                          | 500                                      |
| 4                                         | 0.5                              | 73.5                             | 588                                            | 20                                          | 1000                                     |
| 6                                         | 0.5                              | 40.3                             | 484                                            | 17                                          | 1500                                     |
| 8                                         | 0.5                              | 21.2                             | 339                                            | 12                                          | 2000                                     |
| 10                                        | 0.5                              | 10.3                             | 206                                            | 7                                           | 2500                                     |

**Table S3.** Values of electrolyte resistance ( $R_s$ ) and charge-transfer resistance ( $R_{ct}$ ) of SWE-treated FA supercapacitors

| <b>Samples</b>           | <b><math>R_s</math> (<math>\Omega</math>)</b> | <b><math>R_{ct}</math> (<math>\Omega</math>)</b> |
|--------------------------|-----------------------------------------------|--------------------------------------------------|
| <b>FA-H<sub>2</sub>O</b> | 0.23                                          | 0.87                                             |
| <b>FA-0.1 M</b>          | 0.25                                          | 0.58                                             |
| <b>FA-0.5 M</b>          | 0.15                                          | 0.35                                             |
| <b>FA-1 M</b>            | 0.15                                          | 1.38                                             |

**Table S4.** GCD curves of FA-0.5 M // AC cell under different current densities in PVA-KOH gel electrolyte.

| <b>Current density (A.g<sup>-1</sup>)</b> | <b><math>\Delta V</math> (V)</b> | <b><math>\Delta t</math> (s)</b> | <b>Specific Capacitance (F.g<sup>-1</sup>)</b> | <b>Energy density (W.h.kg<sup>-1</sup>)</b> | <b>Power density (W.kg<sup>-1</sup>)</b> |
|-------------------------------------------|----------------------------------|----------------------------------|------------------------------------------------|---------------------------------------------|------------------------------------------|
| 2                                         | 1.6                              | 222                              | 278                                            | 99                                          | 1600                                     |
| 4                                         | 1.6                              | 89                               | 223                                            | 79                                          | 3200                                     |
| 6                                         | 1.6                              | 50                               | 188                                            | 67                                          | 4800                                     |
| 8                                         | 1.6                              | 26.5                             | 133                                            | 47                                          | 6400                                     |
| 10                                        | 1.6                              | 14.8                             | 93                                             | 33                                          | 8000                                     |

\

**Table S5** Metal content in SWE-treated FA samples as determined by aqua regia digestion method using ICP analysis.

| Element | Content (mg/g) | Leaching efficiency (%) |          |          |        |
|---------|----------------|-------------------------|----------|----------|--------|
|         |                | FA-H <sub>2</sub> O     | FA-0.1 M | FA-0.5 M | FA-1 M |
| Al      | 71.32 ± 2.84   | 47%                     | 54%      | 79%      | 87%    |
| Ca      | 54.06 ± 0.89   | 55%                     | 86%      | 100%     | 100%   |
| Fe      | 36.55 ± 0.26   | 66%                     | 87%      | 100%     | 100%   |
| Mn      | 0.49 ± 0.02    | 74%                     | 87%      | 100%     | 100%   |

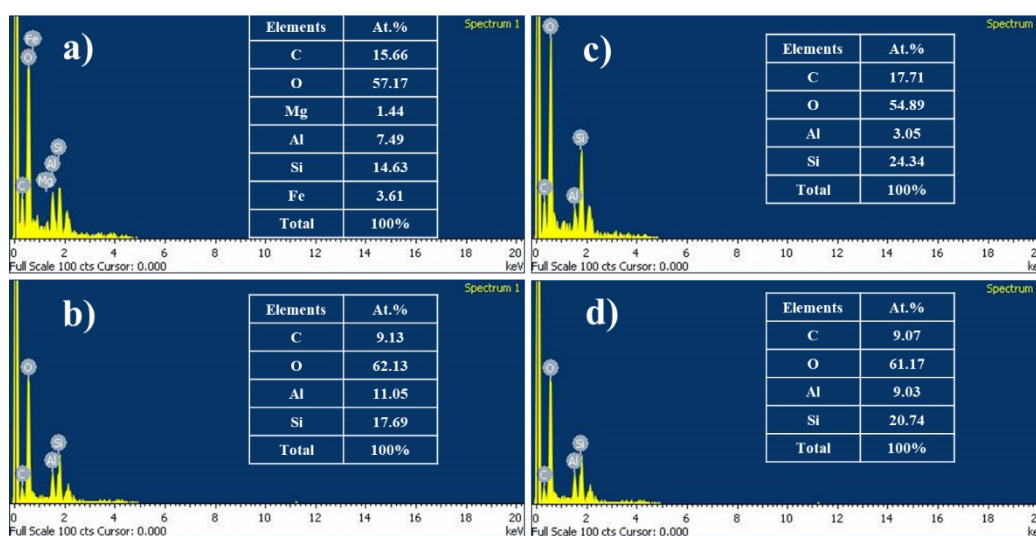

**Fig. S1.** The quantitative elemental composition of (a) FA-H<sub>2</sub>O, (b) FA-0.1 M, (c) FA-0.5 M, and (d) FA-1 M by EDS analysis.
